# Supplementary material for: Selective oxidation of benzene to phenol over FeAlPO catalysts using nitrous oxide as oxidant
Source: Royal Society of Chemistry journal article supplement (doi:10.1039/b608982h), 2006-01-01

**X-ray diffraction patterns of as-synthesised AIPO-5 and FeAIPO-5 catalysts**

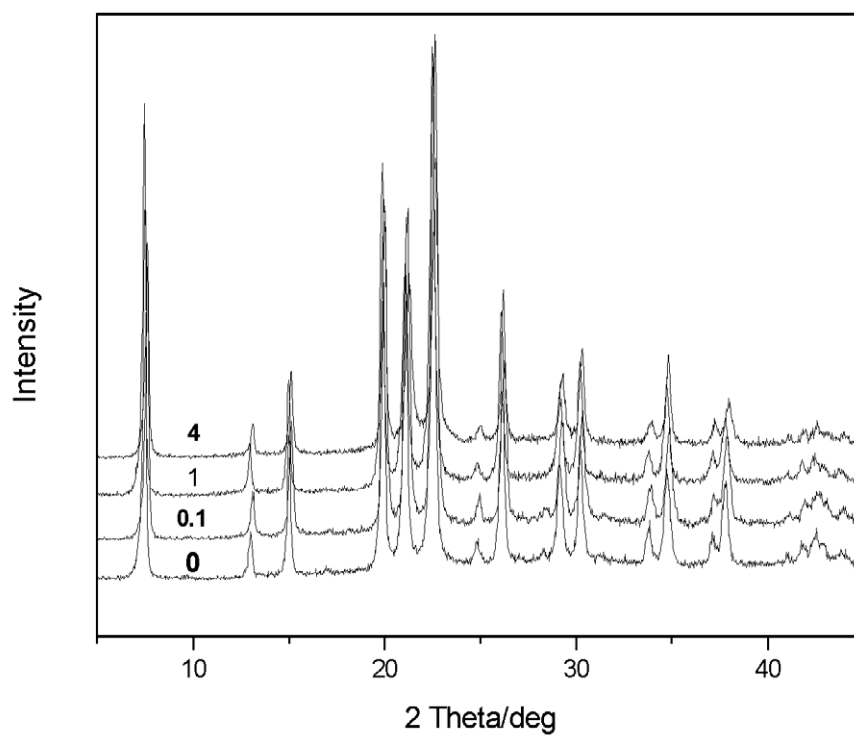

Fig: X-ray diffraction patterns of as-synthesised AIPO-5 catalysts. Numbers in figure indicate the iron content in wt%.

**X-ray diffraction patterns of calcined AIPO-5 and FeAIPO-5 catalysts**

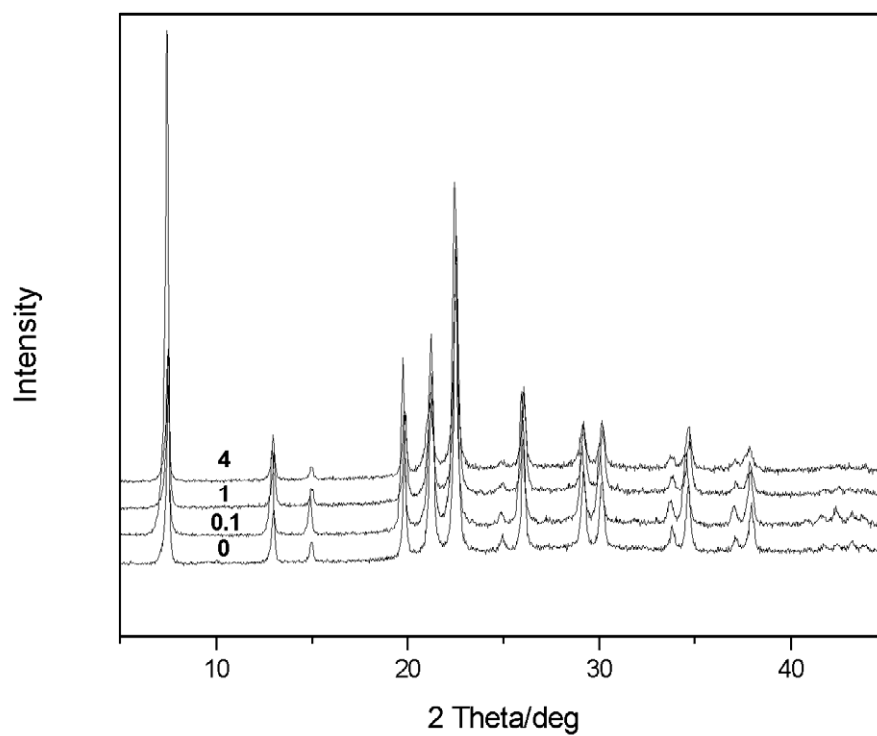

Supplement: b608982h.pdf [file b608982h.pdf]
